# Supplementary material
Source: Frontiers journal article supplement (https://www.frontiersin.org/articles/540631)
Supplement: Data_Sheet_1.docx [file Data_Sheet_1.docx]

***Supplementary Material***

**Hypervalent Iodine Mediated Diastereoselective *α*-Acetoxylation of Cyclic Ketones**

Jiashen Tan#1, Weiqin Zhu#1, Weiping Xu1, Yaru Jing1,2, Zhuofeng Ke2, Yan Liu*1, Keiji Maruoka*1,3

**Table of contents**

| S. No. | Section | Page No. |
| --- | --- | --- |
| 1. | General | S2 |
| 2. | General experimental procedure for the reaction | S2 |
| 3. | Spectral data for products (**1**-**8**) | S3-S5 |
| 4. | X-Ray Diffraction Analysis of compound *cis*-**1** | S5 |
| 6. | Copies of 1H and 13C NMR spectra of products | S6-S13 |
| 7 | Computational details and references | S14 |
| 8 | Cartesian coordinates the optimized structures | S15-S25 |

**General**

1H NMR and 13C NMR spectra were recorded on a Bruker AVANCE III 400 MHz spectrometer (400 MHz for 1H NMR, 100 MHz for 13C NMR). Tetramethylsilane (TMS) was used as an internal standard (0 ppm) for the 1H NMR spectra, and CDCl3 was used as the internal standard (77.16 ppm) for the 13C NMR spectra. Multiplicity is indicated as follows: s (singlet); bs (broad singlet); d (doublet); t (triplet); q (quartet); m (multiplet); dd (doublet of doublets), etc. High-resolution mass spectra (HRMS) were recorded on a Thermo MAT95XP, or on an Agilent 6540 UHD Accurate-Mass Q-TOF LC-MS spectrometer. Infrared (IR) spectra were obtained on a Thermo scientific Nicolet FT/IR-6700 spectrometer. Reactions were monitored by thin-layer chromatography (TLC). Reaction products were purified by column chromatography on silica gel. AcOH was dried before use. Other chemical reagents were purchased from common commercial suppliers and used as received.

**General procedures for the *α*-acetoxylation of cyclic ketones**

To a solution of cyclic ketones (0.5 mmol) and PhI(OAc)2 (241.5 mg, 0.75 mmol) in acetic acid (1 mL) was added BF3•OEt2 (212.9 mg ,1.5 mmol) dropwise, and the reaction mixture was stirred at room temperature for 24 h. The reaction progress was monitored by TLC. Upon completion, the reaction mixture was quenched with saturated aqueous Na2S2O3 and then saturated aqueous NaHCO3, washed with brine, extracted with dichloromethane, and dried over anhydrous Na2SO4. After filtration, the solvent was removed under reduced pressure to afford the crude product, which was purified by silica gel column chromatography using hexane/acetone and analyzed by 1H and 13C NMR spectroscopy.

**2-Oxo-5-phenylcyclohexyl acetate (1):** The crude product was purified via flash chromatography, eluting with hexane/acetone = 30/1 to give a white solid (77.8 mg, 67%). Characterization of the major product (*cis*-isomer): Mp: 90–92 ºC; 1H NMR (400 MHz, CDCl3): *δ* = 7.35-7.23 (m, 5H), 5.38 (dd, *J* = 12.8, 6.4 Hz, 1H), 3.23 (t, *J* = 12.4 Hz, 1H), 2.62-2.59 (m, 2H), 2.49-2.44 (m, 1H), 2.27-2.24 (m, 1H), 2.17 (s, 3H), 2.08 (q, *J* = 12.4 Hz, 1H), 1.96-1.85 (m, 1H); 13C NMR (100 MHz, CDCl3): *δ* = 204.0, 170.1, 143.2, 128.9, 127.1, 126.8, 75.8, 42.1, 40.0, 39. 9, 34.5, 20.8; IR (KBr): 3081, 3021, 2938, 2875, 2854, 1757, 1718, 1641, 1492, 1445, 1423, 1385, 1370, 1324, 1287, 1263, 1245, 1150, 1120, 1072, 1061, 982, 935, 911, 852, 756, 743, 695, 610, 517,466 cm-1; HRMS (ESI) calcd for C14H17O3 [M+H]+: 233.1178; found: 233.1168; calcd for C14H16O3Na [M+Na]+: 255.0997; found: 255.0987.

**5-(tert-Butyl)-2-oxocyclohexyl acetate (2)**: The crude product was purified via flash chromatography, eluting with hexane/acetone = 30/1 to give a colorless oil (60.5 mg, 57%). Characterization of the major product (*cis*-isomer): 1H NMR (400 MHz, CDCl3): *δ* = 5.23-5.18 (m, 1H), 2.52-2.47 (m, 1H), 2.43-2.34 (m, 1H), 2.33-2.27 (m, 1H), 2.15 (s, 3H), 2.13-2.07 (m, 1H), 1.74-1.66 (m, 1H), 1.57 (q, *J* = 12.4 Hz, 1H), 1.48-1.37(m, 1H), 0.93 (s, 9H); 13C NMR (100 MHz, CDCl3): *δ*= 205.0, 170.2 , 76.3, 46.0, 39.7, 34.4, 32.6, 28.2, 27.7, 20.9.

**5-(Dimethyl(phenyl)silyl)-2-oxocyclohexyl acetate (3)**: The crude product was purified via flash chromatography, eluting with hexane/acetone = 30/1 to give a light yellow solid (52.3 mg, 36%). Characterization of the major product (*cis*-isomer): Mp: 121–123 ºC; 1H NMR (400 MHz, CDCl3): *δ*= 7.49-7.37 (m, 5H), 5.15 (dd, *J* = 12.4, 6.4 Hz, 1 H), 2.53-2.50 (m, 1H), 2.43-2.35 (m, 1H), 2.27-2.23 (m, 1H), 2.13 (s, 3H), 2.09-2.04 (m, 1H), 1.61 (q, *J* = 12.8 Hz, 1H), 1.53-1.42 (m, 1H), 1.38-1.32 (m, 1H), 0.33 (s, 6H); 13C NMR (100 MHz, CDCl3): *δ* = 204.9, 170.2, 136.5, 133.9, 129.9, 129.6, 128.1, 77.7, 42.5, 34.7, 28.9, 24.1, 20.9, -4.9, -5.0; IR (KBr): 3071, 3012, 2949, 2935, 2865, 2841, 1748, 1721, 1427, 1407, 1376, 1342, 1321, 1257, 1233, 1173, 1143, 1112, 1102, 1082, 1050, 968, 912, 885, 850, 834, 821, 776, 763, 742, 728, 704, 661, 643, 605, 570, 482, 451, 436 cm-1; HRMS (ESI) calcd for C16H23O3Si [M+H]+: 291.1416; found: 291.1420; calcd for C16H22O3Na [M+Na]+: 313.1236; found: 313.1227.

**2-Oxo-4-phenylcyclohexyl acetate (4)**: The crude product was purified via flash chromatography, eluting with hexane/acetone = 30/1 to give a white solid (54.6 mg, 47%). Characterization of the major product (*trans*-isomer): Mp: 72–74 ºC; 1H NMR (400 MHz, CDCl3): *δ*= 7.35-7.31 (m, 2H), 7.25-7.20 (m, 3H), 5.29 (dd, *J* = 12.8, 6.4 Hz, 1H), 3.02-2.94 (m, 1H), 2.70-2.62 (m, 2H), 2.40-2.35 (m, 1H), 2.18 (s, 3H), 2.14 (m, 1H), 2.09-1.98 (m, 1H), 1.95-1.84 (m, 1H); 13C NMR (100 MHz, CDCl3): *δ* = 203.4, 170.3, 143.2, 129.0, 127.2, 126.6, 76.3, 47.9, 45.4, 31.8, 31.7, 20.9; IR (KBr): 3033, 2959, 2941, 2908, 1745, 1721, 1602, 1501, 1458, 1432, 1376, 1319, 1281, 1233, 1174, 1081, 1046, 897, 763, 703, 665, 599, 531, 501 cm-1; HRMS (ESI) calcd for C14H17O3 [M+H]+: 233.1178; found: 233.1145; calcd for C14H16O3Na [M+Na]+: 255.0997; found: 255.0986.

**4-(tert-Butyl)-2-oxocyclohexyl acetate (5)**: The crude product was purified via flash chromatography, eluting with hexane/acetone = 30/1 to give a light yellow oil (38.2 mg, 36%). Characterization of the major product (*trans*-isomer): 1H NMR (400 MHz, CDCl3): *δ* = 5.15 (dd, *J* = 12.8, 6.8 Hz, 1H), 2.56-2.53 (m, 1H), 2.33-2.27 (m, 1H), 2.22-2.13 (m, 1H), 2.16 (s, 3H), 2.03-2.00 (m, 1H), 1.73-1.63 (m, 1H), 1.56-1.51 (m, 2H), 0.91 (s, 9H); 13C NMR (100 MHz, CDCl3): *δ* = 205.3, 170.3, 76.6, 50.0, 42.4, 32.9, 31.7, 27.4, 25.0, 20.9.

**4,5-Dimethyl-2-oxocyclohexyl acetate (6)**: The crude product was purified via flash chromatography, eluting with hexane/acetone = 30/1 to give a light yellow oil (37.8 mg, 41%). Characterization of the major isomer: 1H NMR (400 MHz, CDCl3): *δ* = 5.19 (dd, *J* = 12.4, 6.8Hz, 1H), 2.67-2.62 (m, 1H), 2.35-2.21 (m, 3H), 2.14 (s, 3H), 2.07-2.03 (m, 1H), 1.74 (q, *J* = 12.8 Hz, 1H), 1.01 (d, *J* = 6.8 Hz, 3H), 0.83 (d, *J* = 6.8 Hz, 3H); 13C NMR (100 MHz, CDCl3): *δ* = 204.6, 170.1, 75.6, 47.3, 36.5, 34.9, 33.2, 20.8, 18.5, 12.1; IR (KBr): 2959, 2928, 2891, 2871, 1749, 1721, 1470, 1455, 1431, 1380, 1370, 1243, 1175, 1102, 1087, 1075, 1036, 975, 941, 885, 790, 715, 651, 609, 549, 510, 482, 436 cm-1; HRMS (ESI) calcd for C10H16O3Na [M+Na]+: 207.0997; found: 207.0988.

**3-Oxodecahydronaphthalen-2-yl acetate (7)**: The crude product was purified via flash chromatography, eluting with hexane/acetone = 30/1 to give a light yellow solid (53.6 mg, 51%). Characterization of the major isomer:1H NMR (400 MHz, CDCl3): *δ* = 5.19 (dd, *J* = 12.0, 6.8 Hz, 1H), 2.41-2.37 (m, 1H), 2.20-2.10 (m, 2H), 2.13 (s, 3H), 1.78-1.68 (m, 4H), 1.56-1.46 (m, 2H), 1.36-0.99 (m, 5H); 13C NMR (100 MHz, CDCl3): *δ* = 204.0, 170.2, 76.1, 47.2, 43.8, 40.5, 39.4, 33.7, 32.5, 25.8, 25.5, 20.8.

**2-Oxo-5-phenylcyclohexyl isobutyrate (8)**: The crude product was purified via flash chromatography, eluting with hexane/acetone = 30/1 to give a white solid (65.1 mg, 50%). Characterization of the major isomer: Mp: 63–65 ºC; 1H NMR (400 MHz, CDCl3): *δ* = 7.38-7.34 (m, 2H), 7.29-7.26 (m, 3H), 5.41(dd, *J* = 12.8, 6.0 Hz, 1H), 3.26 (t, *J* = 12.8 Hz, 1H), 2.71-2.62 (m, 3H), 2.51-2.46 (m, 1H), 2.30-2.26 (m, 1H), 2.11 (q, *J* = 12.8 Hz, 1H), 2.00-1.89 (m, 1H); 1.28 (d, *J* = 6.8 Hz, 3H), 1.23 (d, *J* = 6.8 Hz, 3H); 13C NMR (100 MHz, CDCl3): *δ* = 204.1, 176.4, 143.3, 128.9, 127.1, 126.8, 75.4, 42.1, 40.0, 39.9, 34.5, 34.0, 19.2, 19.1; IR (KBr): 3030, 2977, 2929, 2866, 1751, 1727, 1632, 1605, 1498, 1462, 1429, 1385, 1349, 1293, 1260, 1200, 1165, 1147, 1117, 1069, 977, 918, 843, 763, 739, 701, 596, 540, 507 cm-1; HRMS (ESI) calcd for C16H20O3Na [M+Na]+: 283.1310; found: 283.1299.

**X-Ray Diffraction Analysis of compound *cis*-1**

Compound *cis*-**1** was recrystalized from ethyl acetate/hexane. Single crystal X-ray diffraction data were collected on an XtaLAB Synergy R, DW system, HyPix diffractometer with Cu Kα (λ = 1.54184 Å) radiation. The crystal was kept at 100.01(10) K during data collection. The crystal structure was solved with the ShelXD structure solution program (Sheldrick, 2008), and refined by full-matrix least-squares with the ShelXL (Sheldrick, 2015) in Olex 2-1.3 (Dolomanov et al., 2009).

The crystallographic data of compound *cis*-**1** were summarized in the following table

| empirical formula | C14H16O3 |
| --- | --- |
| formula weight | 232.27 |
| cystal system | monoclinic |
| space group | P21/n |
| *a*, Å | 6.3213 (2) |
| *b*, Å | 30.3013 (7) |
| *c*, Å | 6.9028 (3) |
| *V*, Å3 | 1191.22 (7) |
| *Z* | 4 |
| dcalc, g/cm3 | 1.295 |
| *T*, K | 100.01 (10) |
| R1 (I > 2σ(I)) | 0.0517 |
| wR2 (all data) | 0.1400 |
| Goodness of Fit | 1.043 |

The crystal structure has been deposited at the Cambrige Crystallographic Data Centre (CCDC-1997827). The data can be obtained free of charge via the Internet at [www.ccdc.cam.ac.uk/data_request/cif](http://www.ccdc.cam.ac.uk/data_request/cif).


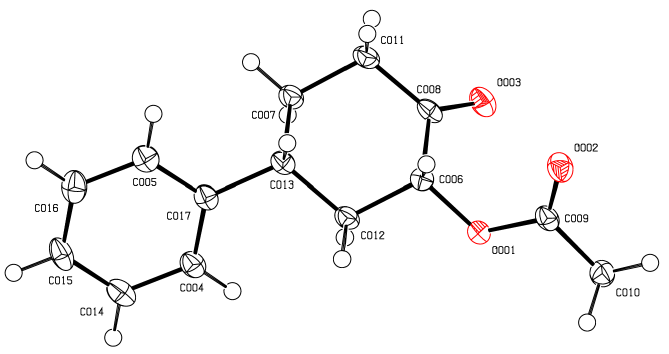


**Copies of 1H and 13C NMR spectra of products:**

**1H and 13C NMR spectra of product *cis*-1**

**1H and 13C NMR spectra of product *cis*-2**

**1H and 13C NMR spectra of product *cis*-3**

**1H and 13C NMR spectra of product *trans*-4**

**1H and 13C NMR spectra of product *trans*-5**

**1H and 13C NMR spectra of product *trans*-6**

**1H and 13C NMR spectra of product 7**

**1H and 13C NMR spectra of product *cis*-8**

**Computational details and references**

All the calculations were carried out using the Gaussian 16 program.1 Geometry optimizations and frequency calculations were carried out with M06-2X functional,2 at the M06-2X/6-311++G(d, p)&SDD(I)3/SMD(acetic acid),4 level of theory. All the optimized structures were further verified to be stationary points as local minima or transition states via vibrational frequency analyses at the same level of theory. All transition states were confirmed to connect correct reactants and products by intrinsic reaction coordinate (IRC) calculations.

1. M. J. Frisch, G. W. Trucks, H. B. Schlegel, G. E. Scuseria, M. A. Robb, J. R. Cheeseman, G. Scalmani, V. Barone, G. A. Petersson, H. Nakatsuji, X. Li, M. Caricato, A. V. Marenich, J. Bloino, B. G. Janesko, R. Gomperts, B. Mennucci, H. P. Hratchian, J. V. Ortiz, A. F. Izmaylov, J. L. Sonnenberg, D. Williams-Young, F. Ding, F. Lipparini, F. Egidi, J. Goings, B. Peng, A. Petrone, T. Henderson, D. Ranasinghe, V. G. Zakrzewski, J. Gao, N. Rega, G. Zheng, W. Liang, M. Hada, M. Ehara, K. Toyota, R. Fukuda, J. Hasegawa, M. Ishida, T. Nakajima, Y. Honda, O. Kitao, H. Nakai, T. Vreven, K. Throssell, J. A. Montgomery, Jr., J. E. Peralta, F. Ogliaro, M. J. Bearpark, J. J. Heyd, E. N. Brothers, K. N. Kudin, V. N. Staroverov, T. A. Keith, R. Kobayashi, J. Normand, K. Raghavachari, A. P. Rendell, J. C. Burant, S. S. Iyengar, J. Tomasi, M. Cossi, J. M. Millam, M. Klene, C. Adamo, R. Cammi, J. W. Ochterski, R. L. Mar-tin, K. Morokuma, O. Farkas, J. B. Foresman, D. J. Fox, Gaussian 16 Revision A.03, *Gaussian, Inc.*, Wallingford CT, 2016.

2. (a) M. Walker, A. J. A. Harvey, A. Sen, C. E. H. Dessent, *J. Phys. Chem. A,* 2013, **117**, 12590-12600. (b) Y. Zhao, D. G. Truhlar, *Theor. Chem. Account,* 2008, **120**, 215-241.

3. D. Andrae, U. Häuβermann, M. Dolg, H. Stoll, H. Preuβ, *Theor. Chim. Acta*, 1991, **78**, 247-266.

4. A. V. Marenich, C. J. Cramer, D. G. Truhlar, *J. Phys. Chem. B*, 2009, **113**, 6378-6396.

**Cartesian coordinates the optimized structures**

#### Itransoidal

6 0.914999 -0.941535 -0.324291

6 1.625449 -1.569775 0.617890

6 3.104660 -1.360768 0.803045

6 3.591853 -0.075248 0.118351

6 3.035869 -0.018085 -1.311255

6 1.509860 0.047346 -1.291174

1 3.443516 0.846060 -1.842083

1 3.352214 -0.914645 -1.855858

1 1.180741 1.060427 -1.017709

1 1.099144 -0.154613 -2.285537

1 3.659509 -2.221255 0.406632

1 1.113050 -2.276064 1.265336

8 -0.415278 -1.204050 -0.486517

53 -1.746310 0.435649 -0.186248

6 -3.196018 -1.091254 0.053630

6 -4.303736 -1.088851 -0.778089

6 -2.980094 -2.051990 1.028006

6 -5.242708 -2.103549 -0.615857

1 -4.439043 -0.319000 -1.527490

6 -3.927498 -3.062180 1.167792

1 -2.096998 -2.025123 1.654532

6 -5.053837 -3.085860 0.351256

1 -6.118747 -2.123333 -1.253532

1 -3.781631 -3.826367 1.922279

1 -5.788471 -3.873984 0.469320

8 -3.541619 1.707202 0.203307

6 -3.261577 2.976246 0.248070

8 -2.122524 3.409628 0.093230

6 -4.448645 3.867689 0.495953

1 -5.164925 3.744229 -0.318717

1 -4.942454 3.565588 1.421000

1 -4.130945 4.906513 0.559150

6 5.098202 0.047381 0.156450

6 5.710410 1.079957 0.868786

6 5.913167 -0.865264 -0.521590

6 7.097583 1.202920 0.904709

1 5.092715 1.797340 1.400577

6 7.298340 -0.745743 -0.489499

1 5.461137 -1.677872 -1.082140

6 7.896436 0.289990 0.225085

1 7.553360 2.013387 1.463176

1 7.913222 -1.462036 -1.023508

1 8.976341 0.383615 0.249530

1 3.172796 0.774826 0.670489

1 3.338944 -1.317887 1.871947

#### Icisoidal

6 0.673002 -1.035942 -0.903128

6 0.899588 -0.654081 0.357662

6 2.280126 -0.341644 0.878003

6 3.290322 -0.119893 -0.256286

6 3.149426 -1.246839 -1.286348

6 1.763921 -1.212559 -1.926334

1 3.919458 -1.156796 -2.057403

1 3.297693 -2.211263 -0.788162

1 1.689632 -0.392129 -2.650849

1 1.567527 -2.135479 -2.479633

1 2.631746 -1.153826 1.527450

1 0.075349 -0.553244 1.058084

8 -0.543844 -1.294880 -1.462845

53 -2.359908 -0.996325 -0.475027

6 -1.900069 1.091386 -0.491312

6 -2.124861 1.839129 0.651354

6 -1.356920 1.615973 -1.651325

6 -1.796807 3.192261 0.616194

1 -2.531292 1.390606 1.549731

6 -1.033815 2.970517 -1.662202

1 -1.181739 0.994148 -2.520721

6 -1.254515 3.755105 -0.534581

1 -1.960620 3.798476 1.499579

1 -0.612518 3.407162 -2.560248

1 -1.000102 4.808619 -0.551917

8 -4.322778 -0.354402 0.322703

6 -4.553816 -0.369088 1.608643

8 -3.695560 -0.587388 2.454106

6 -5.989887 -0.077347 1.958704

1 -6.270511 0.893541 1.545728

1 -6.631143 -0.831139 1.497781

1 -6.125206 -0.079468 3.038318

6 4.702284 0.014257 0.266629

6 5.400594 1.214743 0.129822

6 5.343226 -1.057860 0.897335

6 6.702835 1.346871 0.607171

1 4.918265 2.056691 -0.357535

6 6.643445 -0.930872 1.374360

1 4.822299 -2.002861 1.016867

6 7.329112 0.273368 1.231052

1 7.226468 2.289439 0.489929

1 7.123787 -1.773666 1.859675

1 8.342421 0.371788 1.603975

1 3.027215 0.820145 -0.756497

1 2.240723 0.552919 1.508082

#### Ivert

6 -0.758228 0.106704 -1.369968

6 -1.566318 1.109976 -1.724490

6 -2.986148 1.228815 -1.240645

6 -3.243454 0.350671 -0.007607

6 -2.690118 -1.057851 -0.263549

6 -1.174605 -1.016448 -0.458944

1 -2.943388 -1.721558 0.567241

1 -3.162575 -1.468322 -1.163095

1 -0.669021 -0.900545 0.510000

1 -0.810625 -1.958306 -0.882187

1 -3.680238 0.950922 -2.044214

1 -1.180189 1.869828 -2.398420

8 0.519762 0.032342 -1.861452

53 2.088464 0.630790 -0.585839

6 2.236316 -1.396231 0.048474

6 2.354580 -1.679733 1.398993

6 2.168881 -2.374378 -0.929249

6 2.399123 -3.017862 1.781304

1 2.413575 -0.888341 2.135473

6 2.215495 -3.705957 -0.524910

1 2.066275 -2.114194 -1.975523

6 2.328886 -4.025693 0.824186

1 2.485909 -3.265641 2.832864

1 2.164595 -4.489561 -1.272042

1 2.362681 -5.064547 1.131751

8 3.815923 0.824097 0.823075

6 4.240887 2.048631 0.927763

8 3.724315 2.984593 0.322886

6 5.415663 2.223030 1.852950

1 5.129143 1.913171 2.859870

1 6.233046 1.577988 1.526255

1 5.737232 3.262552 1.861110

6 -4.704550 0.330027 0.380246

6 -5.119949 0.818882 1.619914

6 -5.672311 -0.188593 -0.486806

6 -6.463284 0.792612 1.988165

1 -4.382261 1.224723 2.305723

6 -7.014379 -0.216907 -0.123373

1 -5.374437 -0.575392 -1.456409

6 -7.415397 0.274375 1.117157

1 -6.765044 1.176950 2.956472

1 -7.749414 -0.623259 -0.809809

1 -8.461823 0.253261 1.400659

1 -2.681802 0.781683 0.830260

1 -3.206767 2.274022 -1.000231

#### IIcisoidal

6 0.485609 -2.622019 -0.726638

6 0.357328 -1.121050 -0.846876

6 1.446972 -0.387911 -0.071644

6 2.833244 -0.889276 -0.522679

6 2.944636 -2.401952 -0.297622

6 1.849471 -3.164535 -1.058218

1 1.367938 0.687832 -0.243377

1 2.928213 -0.696175 -1.597942

1 3.923275 -2.758291 -0.626507

1 2.862614 -2.620029 0.772369

1 1.996253 -3.030533 -2.136931

1 1.861537 -4.232140 -0.836916

1 1.324129 -0.569906 1.001339

8 -0.446227 -3.311803 -0.375727

6 3.930988 -0.121363 0.180628

6 4.810369 0.680339 -0.547648

6 4.080756 -0.188083 1.569196

6 5.817660 1.399742 0.090903

1 4.705602 0.741964 -1.626549

6 5.085333 0.529189 2.209708

1 3.408086 -0.803076 2.159265

6 5.957896 1.326289 1.472345

1 6.491010 2.017139 -0.493542

1 5.187896 0.466557 3.287551

1 6.741387 1.883979 1.972942

53 -1.667770 -0.618010 -0.173967

6 -1.249715 1.434955 -0.525122

6 -1.107555 1.868315 -1.834051

6 -1.110601 2.277978 0.566281

6 -0.793403 3.207772 -2.052185

1 -1.242383 1.188656 -2.667056

6 -0.801485 3.613991 0.327488

1 -1.244160 1.908274 1.575240

6 -0.639415 4.075034 -0.975643

1 -0.679713 3.569555 -3.067476

1 -0.689236 4.292213 1.165211

1 -0.399107 5.116856 -1.153687

8 -4.571669 -1.437777 0.930592

6 -4.712710 -0.200005 1.040681

8 -3.859748 0.653996 0.652157

6 -5.968179 0.326352 1.714886

1 -6.825556 -0.298095 1.461520

1 -5.821287 0.271960 2.797561

1 -6.158552 1.364179 1.443443

1 0.371808 -0.844255 -1.905113

#### IIvert

6 -0.137413 -2.257407 0.219217

6 -0.373306 -1.241553 -0.872289

6 -1.820472 -0.782862 -1.000561

6 -2.473662 -0.467753 0.353545

6 -2.337037 -1.675213 1.290580

6 -0.866141 -2.045416 1.519598

1 -1.889995 0.074785 -1.675660

1 -1.941835 0.376510 0.808913

1 -2.809336 -1.458167 2.251160

1 -2.862877 -2.532889 0.857529

1 -0.361491 -1.223724 2.044760

1 -0.756192 -2.947036 2.123111

1 -2.367939 -1.602966 -1.481304

1 0.049836 -1.601437 -1.808383

8 0.617075 -3.187884 0.029243

6 -3.916719 -0.050999 0.169151

6 -4.331701 1.238535 0.503267

6 -4.861972 -0.945192 -0.343153

6 -5.657707 1.628982 0.332387

1 -3.610271 1.945492 0.901810

6 -6.186584 -0.558607 -0.514783

1 -4.564295 -1.954010 -0.612266

6 -6.589544 0.731308 -0.177048

1 -5.960147 2.635654 0.599164

1 -6.906234 -1.265411 -0.913411

1 -7.622314 1.032841 -0.310437

53 0.905841 0.519429 -0.417709

6 2.607866 -0.722510 -0.134579

6 3.008156 -1.004135 1.161931

6 3.243841 -1.234468 -1.253928

6 4.096621 -1.853987 1.337232

1 2.497829 -0.572327 2.013989

6 4.328911 -2.083394 -1.054968

1 2.911009 -0.985021 -2.253841

6 4.750582 -2.392832 0.234056

1 4.428459 -2.091387 2.341164

1 4.841767 -2.499702 -1.914113

1 5.594989 -3.056434 0.379688

8 1.056657 3.669452 -0.000778

6 2.264043 3.421026 0.208782

8 2.776540 2.261854 0.138120

6 3.179316 4.572042 0.587131

1 3.064144 5.380955 -0.136845

1 2.870107 4.956574 1.562396

1 4.220582 4.257204 0.635050

#### axial-IIvert

6 0.130690 -2.738724 0.231020

6 -0.123054 -1.878260 -0.979219

6 -1.501349 -2.078503 -1.596535

6 -2.655950 -2.052145 -0.578103

6 -2.363473 -3.082885 0.519728

6 -1.004177 -2.882889 1.209580

1 -1.650910 -1.367008 -2.409549

1 -3.155819 -3.087824 1.271082

1 -2.372186 -4.073456 0.055479

1 -1.005099 -1.963982 1.808404

1 -0.770077 -3.710178 1.880863

1 -1.477923 -3.072965 -2.058454

1 0.680793 -2.012116 -1.701534

8 1.212444 -3.264971 0.393066

53 0.232087 0.241716 -0.364566

6 2.283431 -0.204991 -0.032835

6 2.684931 -0.552466 1.247312

6 3.160246 -0.129326 -1.103539

6 4.029451 -0.847586 1.454949

1 1.975510 -0.595199 2.064759

6 4.500541 -0.428490 -0.875118

1 2.817709 0.161318 -2.089125

6 4.931781 -0.787134 0.398358

1 4.365117 -1.125518 2.447133

1 5.205170 -0.374083 -1.696822

1 5.977210 -1.017027 0.568937

8 -0.573721 3.395526 -0.517207

6 0.530160 3.498963 0.056868

8 1.286634 2.518446 0.337771

6 1.003207 4.885243 0.459857

1 0.977617 5.543392 -0.411053

1 0.309238 5.291869 1.199754

1 2.008485 4.860527 0.877604

6 -2.951506 -0.641427 -0.080249

6 -3.073443 -0.321850 1.274019

6 -3.123861 0.391444 -1.013720

6 -3.297620 0.991032 1.684329

1 -2.988741 -1.091055 2.032274

6 -3.344569 1.701553 -0.607082

1 -3.082357 0.174753 -2.076216

6 -3.414276 2.010416 0.747838

1 -3.370510 1.214126 2.743119

1 -3.445023 2.485603 -1.348884

1 -3.561070 3.035738 1.066712

1 -3.547552 -2.391695 -1.116247

#### *cis*-TS

6 -0.87228600 1.27874100 1.02229400

6 -0.31049200 0.90555000 -0.33768300

6 1.16547600 0.81234900 -0.59943400

6 2.02941400 0.73282100 0.67136900

6 1.53299800 1.73598700 1.71319600

6 0.11328500 1.39033100 2.15598000

1 1.38108200 -0.02667700 -1.26418700

1 1.91404900 -0.27596900 1.08569000

1 2.19129500 1.72421000 2.58586700

1 1.54214200 2.74853500 1.30172400

1 0.10806600 0.41065200 2.65283400

1 -0.28947000 2.11475600 2.86628000

1 1.41638600 1.72277600 -1.15293100

1 -0.99943000 1.01338800 -1.16697600

8 -2.06323800 1.44094700 1.17037800

6 3.48870900 0.90654200 0.29088800

6 4.15832500 -0.14913000 -0.33884400

6 4.18554300 2.09602400 0.51207100

6 5.48631900 -0.02091000 -0.72937200

1 3.62146400 -1.07633100 -0.51639500

6 5.51694200 2.22631000 0.11949200

1 3.69771700 2.93540300 0.99426300

6 6.17318400 1.16951600 -0.50112000

1 5.98709700 -0.85364800 -1.21216000

1 6.04017200 3.15867700 0.30276600

1 7.20944300 1.27081000 -0.80407100

53 -1.0093610 -1.5935210 -0.15419500

6 -3.05610700 -1.01926600 -0.07576300

6 -3.78943900 -1.29882300 1.07074500

6 -3.61797900 -0.34279000 -1.15120600

6 -5.11667800 -0.88335300 1.13964300

1 -3.33315400 -1.81966400 1.90415600

6 -4.94108300 0.07791600 -1.06445200

1 -3.03324800 -0.12005300 -2.03626900

6 -5.68948900 -0.19109000 0.07769900

1 -5.69586700 -1.09446400 2.03155800

1 -5.38152600 0.62326400 -1.89129800

1 -6.71894100 0.14293500 0.14052400

8 0.98747600 -4.48441400 -0.08020700

6 1.89085200 -3.62275500 -0.17403700

8 1.70470800 -2.37753500 -0.28163500

6 3.34450700 -4.08575000 -0.15524100

1 3.41577200 -5.17143700 -0.09451100

1 3.85074500 -3.73539600 -1.05807500

1 3.85412600 -3.63820300 0.70200800

8 -2.11389800 2.99548900 -1.63038900

6 -1.34421200 3.62506500 -0.88594000

8 -0.28440400 3.14402300 -0.35788200

6 -1.66357600 5.06290900 -0.51795600

1 -2.38976700 5.49117000 -1.20789900

1 -2.08788500 5.06111500 0.49056400

1 -0.75459900 5.66553500 -0.49724700

#### *trans*-TS

6 -0.83067900 -2.03372300 -0.31307900

6 -1.33656300 -0.71392200 0.23018800

6 -1.08718100 -0.25192500 1.63233100

6 0.06990400 -0.96584700 2.35999500

6 -0.00323000 -2.47481100 2.08486400

6 0.01103600 -2.87424600 0.60492800

1 -0.97795600 0.83533500 1.64719900

1 0.81354000 -2.98623800 2.60154900

1 -0.93390500 -2.83716500 2.52880800

1 1.01065600 -2.81156900 0.16378400

1 -0.31747700 -3.90871400 0.47841600

1 -2.02119800 -0.45994800 2.16190000

1 -2.13255900 -0.25799800 -0.34567300

8 -1.08370400 -2.35507100 -1.45217600

53 0.33715400 0.77722300 -1.14126800

6 -0.89424100 2.41538600 -0.56458400

6 -2.21103400 2.48369300 -1.00966500

6 -0.36828200 3.39501000 0.27185600

6 -3.01376500 3.54405100 -0.59754700

1 -2.61221100 1.72035500 -1.66753200

6 -1.17892600 4.45454000 0.67287800

1 0.66115600 3.33374800 0.60607900

6 -2.49984200 4.52825300 0.24189300

1 -4.04145900 3.59736400 -0.93875800

1 -0.77353000 5.22085900 1.32413200

1 -3.12840300 5.35315300 0.55778400

8 3.57361000 -0.12205100 -2.07822500

6 3.09897500 -1.23725000 -1.76349800

8 1.87116500 -1.49896800 -1.62778800

6 4.06109800 -2.40042200 -1.53978100

1 5.09814200 -2.06528300 -1.51987700

1 3.81530700 -2.91843300 -0.60949300

1 3.93503300 -3.11995700 -2.35356200

6 1.41142800 -0.29427800 2.09723100

6 2.51816900 -0.95014900 1.56040400

6 1.54286600 1.06347500 2.41467300

6 3.69772300 -0.25759700 1.28828000

1 2.47556800 -2.00833700 1.33530700

6 2.71716300 1.75584000 2.15231400

1 0.70680900 1.58917200 2.86819300

6 3.79789300 1.09905600 1.56683400

1 4.53800000 -0.78140200 0.84548700

1 2.79036200 2.80957700 2.40043400

1 4.70957300 1.63885200 1.33753600

1 -0.12815700 -0.83073100 3.42854800

8 -4.11154400 -1.33566600 -0.76472900

6 -3.88073700 -2.18395800 0.11103500

8 -2.85105900 -2.18865500 0.86957500

6 -4.84640800 -3.33593200 0.32357500

1 -4.98197900 -3.52829700 1.38877400

1 -5.80562100 -3.13314400 -0.15100500

1 -4.40878100 -4.23222200 -0.12480600

#### *cis*-1

6 1.756240 1.301865 0.241153

6 1.508411 -0.080312 -0.347191

6 0.093043 -0.540100 -0.008368

6 -0.942515 0.480661 -0.504173

6 -0.667465 1.858605 0.115505

6 0.759757 2.341190 -0.192597

1 -0.077773 -1.517690 -0.465409

1 0.872475 2.483623 -1.273799

1 0.988882 3.281977 0.308658

1 0.013800 -0.659379 1.077800

8 2.652507 1.506198 1.027073

8 2.421369 -1.025859 0.195533

6 3.697443 -0.956011 -0.231479

8 4.051677 -0.194366 -1.097229

6 4.566972 -1.932264 0.491322

1 5.576845 -1.892214 0.090566

1 4.574056 -1.679378 1.553758

1 4.153789 -2.937223 0.387432

1 1.637501 -0.016574 -1.432890

1 -0.800894 1.803416 1.201087

1 -1.386519 2.588744 -0.262803

1 -0.833534 0.571960 -1.591590

6 -2.351374 0.003379 -0.221595

6 -3.232822 -0.268843 -1.268256

6 -2.796364 -0.182725 1.090995

6 -4.527850 -0.715208 -1.015126

1 -2.901607 -0.131526 -2.293044

6 -4.088661 -0.627127 1.347465

1 -2.128500 0.018790 1.922758

6 -4.959980 -0.895176 0.294180

1 -5.197501 -0.922375 -1.842622

1 -4.416996 -0.765420 2.371742

1 -5.967460 -1.242118 0.494329

#### *trans*-1

6 1.331294 1.209497 -0.642491

6 1.163628 -0.004680 0.258325

6 0.302212 0.344820 1.475980

6 -1.028264 1.014129 1.102572

6 -0.745670 2.232995 0.203732

6 0.035922 1.839956 -1.061478

1 0.147603 -0.558055 2.071126

1 -0.541550 1.107744 -1.638221

1 0.248086 2.703393 -1.692569

1 0.878341 1.041808 2.092117

8 2.424097 1.641145 -0.930338

8 2.431767 -0.436114 0.739661

6 3.249104 -1.036732 -0.148685

8 2.890542 -1.344762 -1.258429

6 4.612283 -1.250187 0.423488

1 5.197329 -1.882381 -0.240269

1 5.094900 -0.274749 0.525126

1 4.538579 -1.694567 1.416701

1 0.706322 -0.793946 -0.345218

1 -1.457445 1.396023 2.035278

1 -0.157837 2.958663 0.774990

1 -1.671628 2.731333 -0.084975

6 -2.072386 0.082086 0.495889

6 -1.874793 -1.289062 0.322782

6 -3.314203 0.614126 0.125798

6 -2.871376 -2.096156 -0.225660

1 -0.945789 -1.757746 0.624537

6 -4.310980 -0.186467 -0.417337

1 -3.512488 1.670008 0.278772

6 -4.090211 -1.549153 -0.604088

1 -2.687654 -3.157210 -0.353992

1 -5.263662 0.253180 -0.691555

1 -4.863735 -2.176690 -1.031957

#### *trans*-4

6 1.250345 -0.679591 -0.509310

6 1.827702 0.439456 0.345638

6 1.014598 1.713491 0.132460

6 -0.461928 1.460855 0.434630

6 -1.031615 0.336789 -0.442688

6 -0.206586 -0.958053 -0.258226

1 1.418006 2.496792 0.777457

1 -0.310496 -1.309735 0.774972

1 -0.542900 -1.746463 -0.932738

1 1.139812 2.036911 -0.906265

8 1.911600 -1.242834 -1.350952

8 3.176363 0.701697 -0.021597

6 4.090805 -0.218823 0.340659

8 3.815270 -1.171092 1.028636

6 5.439089 0.100039 -0.217240

1 6.185021 -0.553281 0.229252

1 5.408770 -0.059689 -1.297977

1 5.683489 1.147363 -0.036705

1 1.779306 0.129017 1.394893

1 -0.582546 1.198068 1.491809

1 -1.032203 2.377464 0.265000

6 -2.499974 0.089254 -0.173728

6 -3.446359 0.270152 -1.182733

6 -2.939338 -0.318387 1.089501

6 -4.800641 0.051793 -0.939492

1 -3.120375 0.584711 -2.169302

6 -4.290299 -0.535961 1.336248

1 -2.221133 -0.469759 1.889522

6 -5.226479 -0.351092 0.321296

1 -5.521592 0.196235 -1.736610

1 -4.613939 -0.851661 2.321939

1 -6.279626 -0.522414 0.513677

1 -0.931379 0.644735 -1.489701

#### *cis*-4

6 -0.973390 -0.224157 0.988443

6 -1.544933 -0.703189 -0.339001

6 -0.421492 -0.978210 -1.332284

6 0.551162 -1.996317 -0.740625

6 1.199336 -1.480013 0.559764

6 0.100290 -1.106806 1.574309

1 -0.859926 -1.349800 -2.260683

1 -0.402971 -2.031890 1.880962

1 0.502992 -0.630767 2.469552

1 0.093188 -0.038271 -1.558080

8 -1.368291 0.792189 1.512234

8 -2.405502 0.290115 -0.882351

6 -3.615787 0.430849 -0.307747

8 -4.026720 -0.324724 0.538597

6 -4.344128 1.615747 -0.853030

1 -5.374802 1.605864 -0.506549

1 -3.843020 2.519022 -0.496116

1 -4.302294 1.614467 -1.942860

1 -2.108735 -1.623103 -0.147617

1 0.017764 -2.928705 -0.525416

1 1.772774 -2.303410 0.995397

1 1.326489 -2.231188 -1.472654

6 2.183857 -0.358738 0.266465

6 1.976117 0.969385 0.640055

6 3.355013 -0.672663 -0.434300

6 2.904630 1.957213 0.310600

1 1.093937 1.257582 1.199479

6 4.282453 0.307533 -0.761195

1 3.542654 -1.703451 -0.721412

6 4.057616 1.632692 -0.391954

1 2.719985 2.983125 0.609653

1 5.182990 0.038563 -1.302364

1 4.778604 2.401371 -0.646134

#### *cis*-6

6 0.125279 1.067113 -0.145000

6 0.445424 -0.403788 -0.371577

6 -0.714769 -1.263406 0.122620

6 -2.040792 -0.829565 -0.514527

6 -2.329377 0.664784 -0.259252

6 -1.155424 1.516720 -0.789459

1 -0.501541 -2.308332 -0.117404

1 -1.058266 1.370765 -1.871140

1 -1.303617 2.578514 -0.587201

1 -0.771484 -1.183162 1.213385

8 0.826094 1.771210 0.546292

8 1.617522 -0.774006 0.347037

6 2.789383 -0.301638 -0.120565

8 2.878176 0.301463 -1.161851

6 3.919509 -0.629028 0.800197

1 4.860327 -0.326809 0.346464

1 3.770718 -0.094395 1.740971

1 3.924487 -1.698152 1.018067

1 0.601606 -0.558388 -1.444075

6 -3.175783 -1.735172 -0.043880

1 -3.239248 -1.760122 1.047177

1 -4.139470 -1.393278 -0.432047

1 -3.019683 -2.760075 -0.389869

6 -2.610873 0.995052 1.207285

1 -2.800362 2.065343 1.322766

1 -3.490773 0.462218 1.573497

1 -1.767154 0.743791 1.857869

1 -1.940877 -0.948588 -1.601385

1 -3.214461 0.934904 -0.843957

#### *tans*-6

6 -0.287854 1.419668 -0.292569

6 0.515307 0.141690 -0.158359

6 -0.124061 -0.765647 0.897573

6 -1.591417 -1.074894 0.574733

6 -2.384775 0.241573 0.462127

6 -1.749481 1.196566 -0.569473

1 0.459512 -1.687278 0.963230

1 -1.838495 0.761951 -1.572984

1 -2.253591 2.164627 -0.574791

1 -0.053363 -0.251521 1.862348

8 0.210786 2.515036 -0.160595

8 1.847640 0.489798 0.212041

6 2.821790 -0.380754 -0.096457

8 2.611283 -1.424278 -0.667506

6 4.160206 0.117478 0.344102

1 4.912713 -0.647158 0.166096

1 4.405845 1.021998 -0.216552

1 4.124522 0.380302 1.402531

1 0.528451 -0.353727 -1.134783

6 -3.858872 0.024187 0.137192

1 -4.313410 -0.680121 0.839843

1 -4.411422 0.965197 0.198898

1 -3.987572 -0.372737 -0.873676

6 -1.725037 -1.982603 -0.651148

1 -1.062979 -2.846949 -0.551600

1 -2.744519 -2.359683 -0.755607

1 -1.462448 -1.476070 -1.584123

1 -1.997562 -1.621057 1.433319

1 -2.318193 0.734197 1.440011
